# Supplementary material for: Sirt1 Protects Against Hippocampal Atrophy and its Induced Cognitive Impairment in Middle-aged Mice
Source: Research Square preprint supplement (doi:10.21203/rs.3.rs-1126398/v1), 2021-12-28
Supplement: Supplementary file 1 [file 3bf62a1d5008b154050361d4.docx]

Supplementary Information

for

***Sirt1* protects against hippocampal atrophy and its induced cognitive impairment in middle-aged mice**

Zuhao Sun1,2†, Shuang Zhao1†, Xinjun Suo1,2, Yan Dou1*

*1 Department of Radiology and Tianjin Key Laboratory of Functional Imaging, Tianjin Medical University General Hospital, Tianjin 300052, P. R. China*

*2 School of Medical Technology, Tianjin Medical University, Tianjin 300070, P. R. China*

†These authors contributed equally to this work.

***Correspondence:** douyan@tmu.edu.cn (Y. D.)





**Figure S1. Western blotting analysis of related protein levels after hippocampal *Sirt1* knockdown.**
